# Supplementary material for: 3D printing collagen/heparin sulfate scaffolds boost neural network reconstruction and motor function recovery after traumatic brain injury in canine
Source: Royal Society of Chemistry journal article supplement (doi:10.1039/d0bm01116a), 2020-01-01
Supplement: d0bm01116a1.zip [file d0bm01116a1.zip]

**Table 1. Detailed data of porosity ratio in groups**

|  | C | CH | 3D-C | 3D-CH |
| --- | --- | --- | --- | --- |
| 1 | 35.126 | 62.784 | 52.239 | 95.249 |
| 2 | 36.373 | 65.293 | 41.427 | 96.138 |
| 3 | 38.268 | 70.298 | 47.369 | 78.278 |
| 4 | 33.134 | 64.579 | 53.652 | 81.738 |
| 5 | 37.823 | 68.128 | 42.738 | 65.652 |
| 6 | 39.284 | 73.239 | 51.139 | 71.293 |
| 7 | 37.589 | 68.327 | 51.235 | 74.367 |
| 8 | 31.782 | 51.128 | 52.392 | 91.129 |
| 9 | 31.758 | 53.237 | 38.239 | 101.268 |
| 10 | 39.259 | 63.792 | 38.735 | 75.239 |
| Mean (%) | **36.04** | **64.08** | **47.02** | **83.04** |
| SD (%) | **2.93** | **7.04** | **6.16** | **12.11** |
